# Supplementary material for: An Investigation of the Neurotoxic Effects of Malathion, Chlorpyrifos, and Paraquat to Different Brain Regions
Source: MDPI journal article supplement (doi:10.3390/brainsci12080975), 2022-07-24
Supplement: s1 [file s1]

|                           |      | Control         | MAL<br>50<br>mg/kg | MAL<br>100<br>mg/kg | MAL<br>150<br>mg/kg | CPF<br>25<br>mg/kg | CPF<br>50<br>mg/kg | CPF<br>100<br>mg/kg | PQ<br>1 mg/kg   | PQ<br>5 mg/kg   | PQ<br>10<br>mg/kg |
|---------------------------|------|-----------------|--------------------|---------------------|---------------------|--------------------|--------------------|---------------------|-----------------|-----------------|-------------------|
| Mitochondrial complex I   |      | Hippocampus     |                    |                     |                     |                    |                    |                     |                 |                 |                   |
|                           | Vmax | 0.48 ±<br>0.03  | 0.43 ±<br>0.01     | 0.38 ±<br>0.03      | 0.65 ±<br>0.06      | 0.43 ±<br>0.01     | 0.38 ±<br>0.03     | 0.65 ±<br>0.06      | 0.48 ±<br>0.02  | 0.44 ±<br>0.00  | 0.45 ±<br>0.03    |
|                           | Ki   | 37.9 ±<br>5.5   | 56.72 ±<br>3.4     | 70.19 ±<br>11.4     | 309.40 ±<br>39.3    | 56.7 ±<br>3.4      | 70.2 ±<br>11.39    | 309.40 ±<br>39.3    | 44.7 ±<br>4.4   | 65.2 ±<br>0.9   | 117.1 ±<br>14.04  |
|                           |      | Corpus striatum |                    |                     |                     |                    |                    |                     |                 |                 |                   |
|                           | Vmax | 0.43 ±<br>0.03  | 0.43 ±<br>0.03     | 0.38 ±<br>0.03      | 0.39 ±<br>0.04      | 0.43 ±<br>0.03     | 0.38 ±<br>0.03     | 0.39 ±<br>0.04      | 0.41 ±<br>0.02  | 0.39 ±<br>0.01  | 0.39 ±<br>0.02    |
|                           | Ki   | 30.79 ±<br>6.1  | 56.71 ±<br>7.9     | 76.19 ±<br>13.6     | 141.90 ±<br>22.9    | 56.71 ±<br>7.9     | 76.19 ±<br>13.6    | 141.90 ±<br>22.9    | 37.07 ±<br>4.5  | 59.96 ±<br>3.1  | 117.60 ±<br>11.2  |
|                           |      | Cerebellum      |                    |                     |                     |                    |                    |                     |                 |                 |                   |
|                           | Vmax | 0.46 ±<br>0.02  | 0.40 ±<br>0.01     | 0.42 ±<br>0.02      | 0.44 ±<br>0.03      | 0.36 ±<br>0.01     | 0.40 ±<br>0.02     | 0.34 ±<br>0.03      | 0.45 ±<br>0.01  | 0.42 ±<br>0.00  | 0.42 ±<br>0.02    |
|                           | Ki   | 35.98 ±<br>4.2  | 39.98 ±<br>3.9     | 64.11 ±<br>5.30     | 104.90 ±<br>15.5    | 47.27 ±<br>2.6     | 104.50 ±<br>9.8    | 153.10 ±<br>22.0    | 41.81 ±<br>3.3  | 59.93 ±<br>1.4  | 99.98 ±<br>7.55   |
|                           |      | Cerebral cortex |                    |                     |                     |                    |                    |                     |                 |                 |                   |
|                           | Vmax | 0.52 ±<br>0.02  | 0.50 ±<br>0.01     | 0.43 ±<br>0.01      | 0.51 ±<br>0.05      | 0.51 ±<br>0.01     | 0.40 ±<br>0.03     | 0.34 ±<br>0.05      | 0.50 ±<br>0.02  | 0.47 ±<br>0.01  | 0.46 ±<br>0.03    |
|                           | Ki   | 38.8 ±<br>4.62  | 59.1 ±<br>2.80     | 70.58 ±<br>4.28     | 160.40 ±<br>24.3    | 74.4 ±<br>3.01     | 88.3 ±<br>15.1     | 149.8 ±<br>36.9     | 43.5 ±<br>4.60  | 63.67 ±<br>2.1  | 107.7 ±<br>11.7   |
| Mitochondrial complex III |      | Hippocampus     |                    |                     |                     |                    |                    |                     |                 |                 |                   |
|                           | Vmax | 0.49 ±<br>0.01  | 0.47 ±<br>0.01     | 0.43 ±<br>0.02      | 0.44 ±<br>0.05      | 0.46 ±<br>0.02     | 0.48 ±<br>0.02     | 0.57 ±<br>0.03      | 0.48 ±<br>0.01  | 0.43 ±<br>0.02  | 0.38 ±<br>0.05    |
|                           | Ki   | 29.71 ±<br>1.94 | 34.92 ±<br>2.53    | 43.63 ±<br>4.95     | 72.74 ±<br>18.88    | 41.70 ±<br>4.15    | 61.87 ±<br>6.59    | 155.30 ±<br>14.47   | 33.78 ±<br>1.30 | 43.63 ±<br>4.95 | 61.17 ±<br>16.90  |
|                           |      | Cerebral cortex |                    |                     |                     |                    |                    |                     |                 |                 |                   |
|                           | Vmax | 0.45 ±<br>0.45  | 0.39 ±<br>0.01     | 0.36 ±<br>0.02      | 0.44 ±<br>0.07      | 0.39 ±<br>0.01     | 0.36 ±<br>0.02     | 0.44 ±<br>0.07      | 0.41 ±<br>0.41  | 0.38 ±<br>0.38  | 0.35 ±<br>0.35    |
|                           | Ki   | 24.27 ±<br>1.27 | 36.01 ±<br>1.45    | 51.06 ±<br>5.15     | 141.8 ±<br>8.93     | 36.01 ±<br>1.45    | 51.06 ±<br>5.15    | 141.80 ±<br>12.93   | 29.33 ±<br>2.33 | 42.61 ±<br>2.61 | 72.95 ±<br>2.95   |
|                           |      | Cerebellum      |                    |                     |                     |                    |                    |                     |                 |                 |                   |
|                           | Vmax | 0.45 ±<br>0.01  | 0.44 ±<br>0.01     | 0.41 ±<br>0.02      | 0.44 ±<br>0.01      | 0.44 ±<br>0.01     | 0.41 ±<br>0.02     | 0.44 ±<br>0.01      | 0.40 ±<br>0.01  | 0.47 ±<br>0.03  | 0.41 ±<br>0.01    |

|  |      |                 |                 |                 |                  |                 |                 |                  |                 |                 |                  |
|--|------|-----------------|-----------------|-----------------|------------------|-----------------|-----------------|------------------|-----------------|-----------------|------------------|
|  | Ki   | 20.98 ±<br>1.62 | 30.56 ±<br>2.20 | 41.78 ±<br>4.29 | 78.43 ±<br>5.12  | 30.56 ±<br>2.20 | 41.78 ±<br>4.29 | 78.43 ±<br>5.12  | 25.93 ±<br>2.46 | 52.20 ±<br>8.58 | 72.86 ±<br>5.52  |
|  |      | Corpus striatum |                 |                 |                  |                 |                 |                  |                 |                 |                  |
|  | Vmax | 0.53 ±<br>0.02  | 0.50 ±<br>0.01  | 0.49 ±<br>0.02  | 0.56 ±<br>0.02   | 0.50 ±<br>0.01  | 0.49 ±<br>0.02  | 0.56 ±<br>0.02   | 0.52 ±<br>0.01  | 0.49 ±<br>0.02  | 0.44 ±<br>0.04   |
|  | Ki   | 31.02 ±<br>2.89 | 42.84 ±<br>2.18 | 62.80 ±<br>5.52 | 129.30 ±<br>9.96 | 42.84 ±<br>2.18 | 62.80 ±<br>5.52 | 129.30 ±<br>9.96 | 35.11 ±<br>2.43 | 47.28 ±<br>3.91 | 63.83 ±<br>12.44 |

**Supplementary Table S2:** Pesticide effects on mitochondrial complex I and complex III activities.

Rats were dosed with malathion (MAL), chlorpyrifos (CPF), or paraquat (PQ) and the activities of mitochondrial complex I and complex III quantified. A Michaelis-Menten model was used to determine values for the enzymatic maximal velocity (Vmax) and inhibitor constant (Ki) at each of the dosing levels and within the hippocampus (HC), corpus striatum (CS), cerebellum (CER) and cerebral cortex (CC).
