# Supplementary material for: An Investigation of the Neurotoxic Effects of Malathion, Chlorpyrifos, and Paraquat to Different Brain Regions
Source: MDPI journal article supplement (doi:10.3390/brainsci12080975), 2022-07-24
Supplement: s1 [file s1]

| Pesticide | Source of Variation | AChE                                       | NTE                                        |
|-----------|---------------------|--------------------------------------------|--------------------------------------------|
|           |                     | % of total variation<br>( <i>p</i> -value) | % of total variation<br>( <i>p</i> -value) |
| MAL       | Interaction         | 6.73 (< 0.0001)                            | 6.72 (< 0.0001)                            |
|           | Dose                | 12.70 (< 0.0001)                           | 41.26 (< 0.0001)                           |
|           | Brain region        | 68.20 (< 0.0001)                           | 20.48 (< 0.0001)                           |
| CPF       | Interaction         | 6.90 (< 0.0001)                            | 3.92 (0.0011)                              |
|           | Dose                | 13.17 (< 0.0001)                           | 40.68 (< 0.0001)                           |
|           | Brain region        | 69.27 (< 0.0001)                           | 18.28 (< 0.0001)                           |
| PQ        | Interaction         | 7.17 (< 0.0001)                            | 5.70 (< 0.0001)                            |
|           | Dose                | 12.49 (< 0.0001)                           | 48.55 (< 0.0001)                           |
|           | Brain region        | 70.09 (< 0.0001)                           | 15.51 (< 0.0001)                           |

**Supplementary Table S1:** Association of pesticide-induced inhibition of acetylcholinesterase and neuropathy target esterase with pesticide dose and brain region.

Rats were dosed with malathion (MAL), chlorpyrifos (CPF), or paraquat (PQ) and the level of acetylcholinesterase (AChE) and neuropathy target esterase (NTE) activity quantified within the hippocampus, corpus striatum, cerebellum and cerebral cortex. A two-way ANOVA was performed to consider the association between pesticide inhibition of AChE and NTE, and pesticide dose and brain region.
